# Supplementary material
Source: Copernicus journal article supplement (doi:10.5194/egusphere-2026-3116)
Supplement: Supplementary file 1 [file egusphere-2026-3116-supplement.pdf]

## Supplementary figures

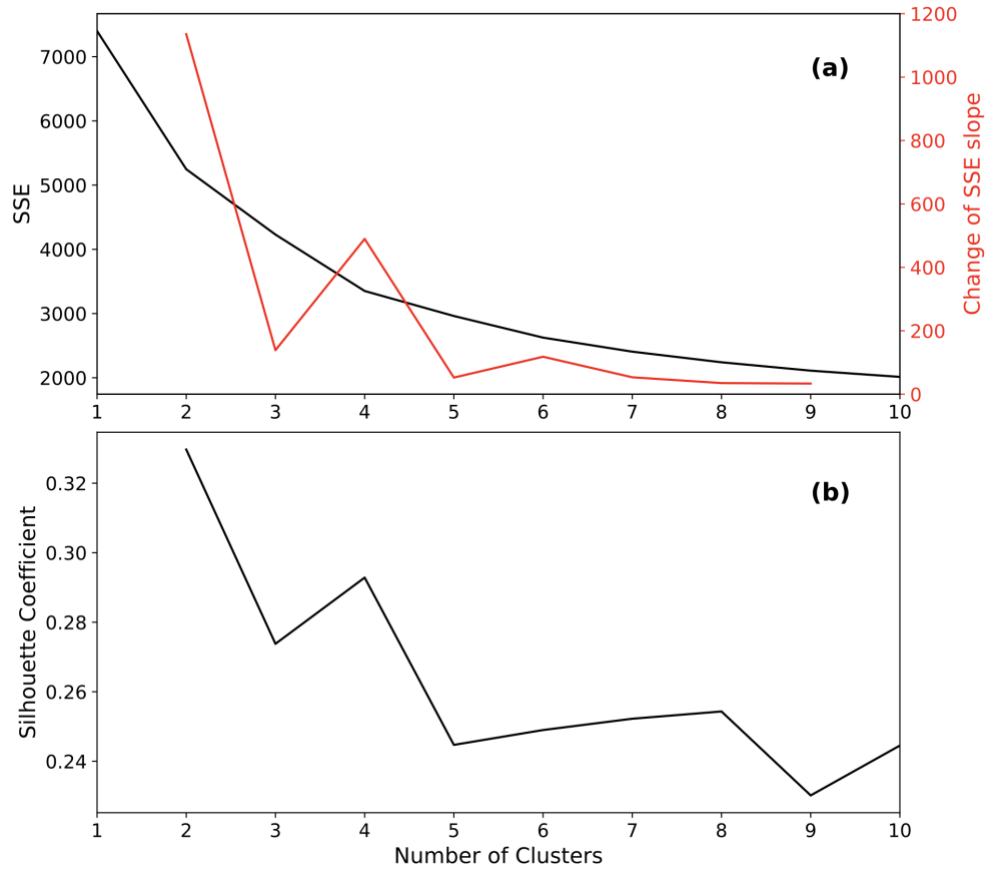

**Figure S1:** (a) Sum of squared errors (SSE; left y-axis) and change of SSE slope (right y-axis; red) as  $K$  varies between 1 and 10. Both  $K = 2$  and  $K = 4$  appear as an “elbow” in the plot where the further increase in  $K$  does not substantially reduce SSE. The change of SSE slope shown in red (right y-axis), defined as  $(SSE_{K+1} - SSE_K) - (SSE_K - SSE_{K-1})$  where positive and negative values imply a slowdown and acceleration of SSE reduction, respectively, confirms this finding. (b) Silhouette Coefficient for  $K$  between 2 and 10 where values are relatively high at  $K = 2$  and  $K = 4$ .

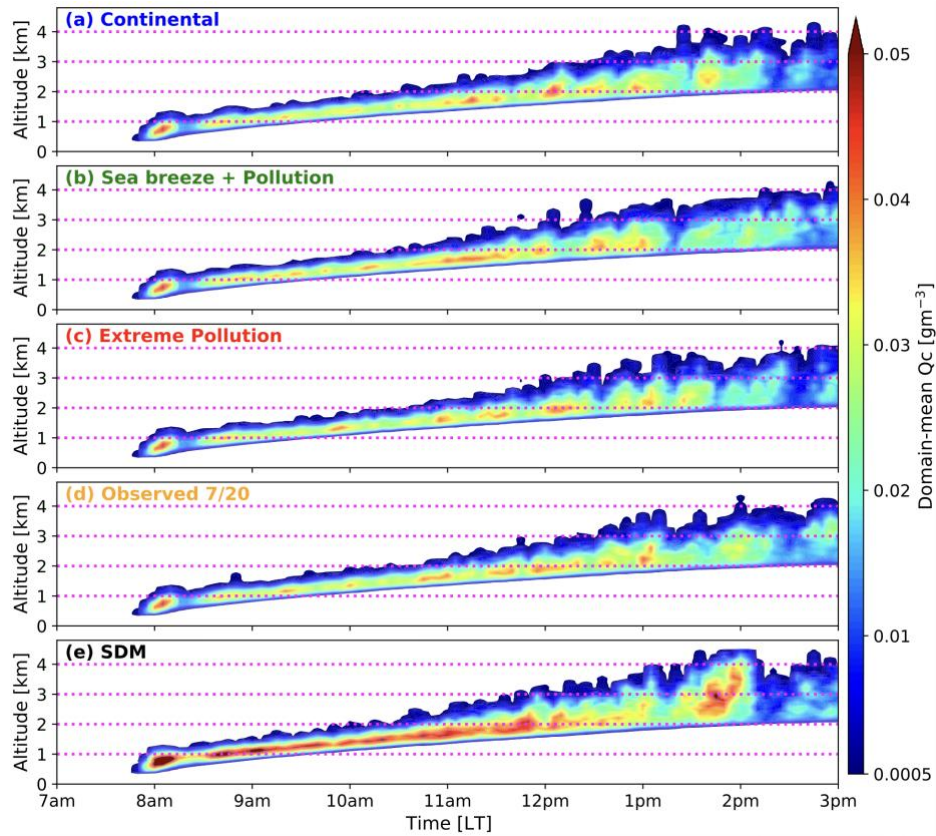

**Figure S2:** Domain-mean cloud mass [ $gm^{-3}$ ] in the CM1 simulations using the Morrison bulk microphysics scheme with (a) Continental, (b) Sea breeze + Pollution, (c) Extreme Pollution, (d) Observed aerosols, and using (e) the SDM.

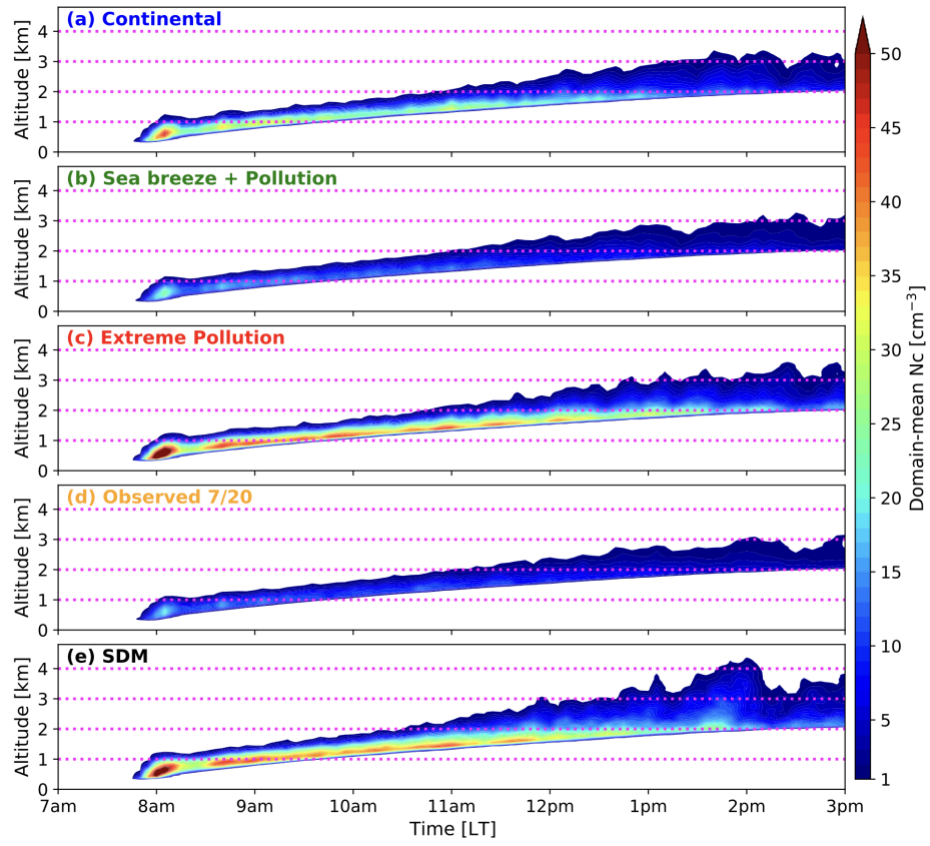

**Figure S3:** Same as Figure S2 but for domain-mean droplet number concentration [ $\text{cm}^{-3}$ ].

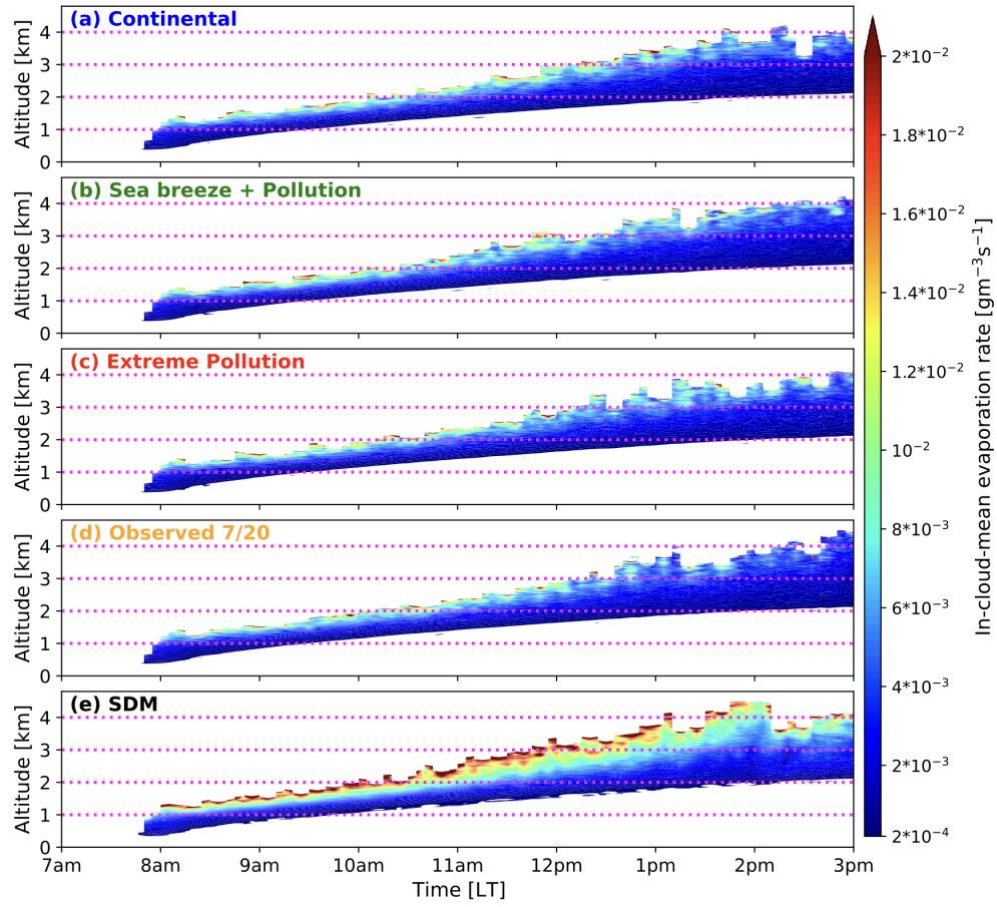

**Figure S4:** Same as Figure S2 but for in-cloud-mean evaporation rate [ $\text{gm}^{-3}\text{s}^{-1}$ ].
